# Supplementary material for: A Rapid HPLC Method for the Concurrent Determination of Several Antihypertensive Drugs from Binary and Ternary Formulations
Source: MDPI journal article supplement (doi:10.3390/separations8060086), 2021-06-16
Supplement: s1 [file s1]

Supplementary Materials

# A Rapid HPLC Method for the Concurrent Determination of Several Antihypertensive Drugs from Binary and Ternary Formulations

**Mahesh Attimarad <sup>1,\*</sup>, Katharigatta N. Venugopala <sup>1,2</sup>, Nagaraja Sreeharsha <sup>1,3</sup>, Muhammad S. Chohan <sup>4</sup>, Sheeba Shafi <sup>5</sup>, Anroop B. Nair <sup>1</sup> and Shinu Pottathil <sup>4</sup>**

<sup>1</sup> Department of Pharmaceutical Sciences, College of Clinical Pharmacy, King Faisal University, Al-Ahsa 31982, Saudi Arabia; kvenugopala@kfu.edu.sa (K.N.V.); sharsha@kfu.edu.sa (S.N.); anair@kfu.edu.sa (A.B.N.)

<sup>2</sup> Department of Biotechnology and Food Technology, Durban University of Technology, Durban 4001, South Africa

<sup>3</sup> Department of Pharmaceutics, Vidya Siri College of Pharmacy, Off Sarjapura Road, Bangalore 560035, India

<sup>4</sup> Department of Biomedical Sciences, College of Clinical Pharmacy, King Faisal University, Al Ahsa 31982, Saudi Arabia; mshwhan@kfu.edu.sa (M.S.C.); spottathail@kfu.edu.sa (S.P.)

<sup>5</sup> Department of Nursing, College of Applied Medical Sciences, King Faisal University, Al Ahsa 31982, Saudi Arabia; sheeba@kfu.edu.sa

\* Correspondence: mattimarad@kfu.edu.sa. Tel.: +966-553269799

## Equations Used for Calculation

### 1. Resolution:

Resolution is measured by dividing the difference in peak retention times by the average peak width.

### Resolution Equation

$$R_s = (t_{R2} - t_{R1}) / (1/2)(t_{W1} + t_{W2}) \quad (1)$$

Where  $R_s$  = resolution  $t_{R2}$  = retention time of 2<sup>nd</sup> peak  $t_{R1}$  = retention time of 1<sup>st</sup> peak  $t_{W1}$  = Peak width of 1<sup>st</sup> peak  $t_{W2}$  = Peak width of 2<sup>nd</sup> peak

A resolution of 1.5 is considered a complete separation.

### 2. Tailing factor (Peak tailing):

Where  $T$  = tailing factor

$$T = (a + b) / 2a \quad (2)$$

$a$  = distance from the leading edge of peak to the midpoint (measured at 5% of peak height)

$b$  = distance from the point at peak midpoint to the trailing edge (measured at 5% of peak height)

Ideal peak has  $T = 1$  but values in the range 0.9 – 1.1 are acceptable

### 3. Percent relative error:

$$RE\% = [(Theoretical\ value - Experimental\ value) / Theoretical\ value \times 100\%] \quad (3)$$

**Citation:** Attimarad, M.; Venugopala K.N.; Sreeharsha N.; Chohan, M.S.; Shafi, S.; Nair, A.B.; Pottathil S. A rapid HPLC method for the concurrent determination of several antihypertensive drugs from binary and ternary formulations. *Separations* 2021, 8, 86. <https://doi.org/10.3390/separations8060086>

Academic Editors: Joaquim Jaumot

Received: 12 May 2021

Accepted: 10 June 2021

Published: 16 June 2021

**Publisher's Note:** MDPI stays neutral with regard to jurisdictional claims in published maps and institutional affiliations.

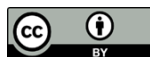

**Copyright:** © 2021 by the authors. Submitted for possible open access publication under the terms and conditions of the Creative Commons Attribution (CC BY) license (<https://creativecommons.org/licenses/by/4.0/>).

### 1. Percent relative standard deviation:

$$\text{RSD}\% = (\text{Standard deviation}/\text{mean}) \times 100\% \quad (4)$$

### Preparation of standard solutions for validation

#### Linearity

Standard solution of AMD, HCZ, OLM, IRB and TEL ( $1000\mu\text{g mL}^{-1}$ ) was prepared separately by dissolving 100 mg of analyte in 100 mL volumetric flask. Further for linearity 10, 50, 75, 100 125 and 150  $\mu\text{L}$  of AMD solution, 50, 100, 150, 200, 250 and 300  $\mu\text{L}$  of HCZ solution, 50, 200, 400, 800, 1200 and 1600  $\mu\text{L}$  of OLM and TEL solution and 100, 1000, 1500, 2000, 2500 and 3000  $\mu\text{L}$  of IRB solutions were transferred in to 10 mL volumetric flask. Final volume was adjusted with the mobile phase to 10 mL mark. 20  $\mu\text{L}$  of this solution was injected into the HPLC system in triplicate.

#### Precision

For precision 10, 75, and 150  $\mu\text{L}$  of AMD solution, 50, 150, and 300  $\mu\text{L}$  of HCZ solution, 50, 800, and 1600  $\mu\text{L}$  of OLM and TEL solution and 100, 1500, and 3000  $\mu\text{L}$  of IRB solutions were transferred in to 10 mL volumetric flask. Final volume was adjusted with the mobile phase to get three concentrations (low, medium and high) of all analytes. 20  $\mu\text{L}$  of this solution was injected into the HPLC system in triplicate for inter day precision and same solutions were injected for three successive days for intra day precision.

#### Accuracy

Laboratory prepared mixture consisting of HCZ 10 mg, AMD 5 mg, TEL 40 mg, OLM 20 mg and IRB 100 mg was prepared. 17.5 mg of mixture was weighed and dissolved in 100 ml of ethanol. 20  $\mu\text{L}$  of solution was injected in triplicate and concentration of all analytes were calculated using corresponding regression equations. Further 8.75 mg, 17.5 mg and 26.25 mg of freshly prepared mixture was added to 17.5 mg of above prepared mixture and dissolved in 100 ml of ethanol. All three solutions were analyzed by injecting 20  $\mu\text{L}$  in triplicate.

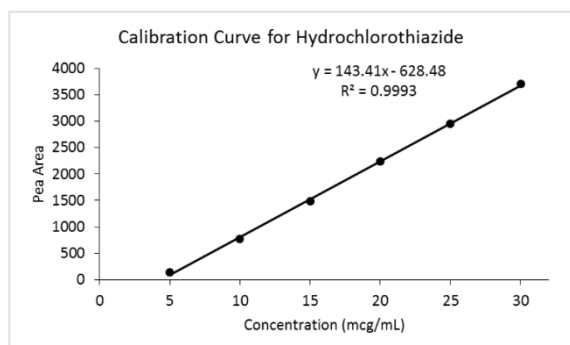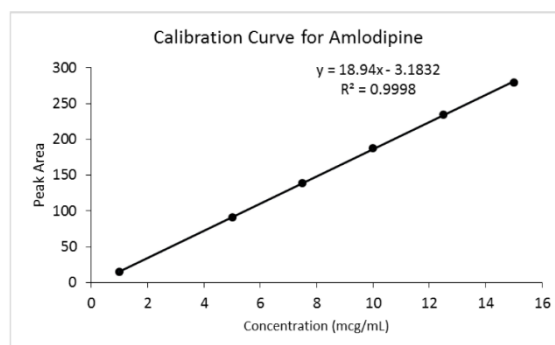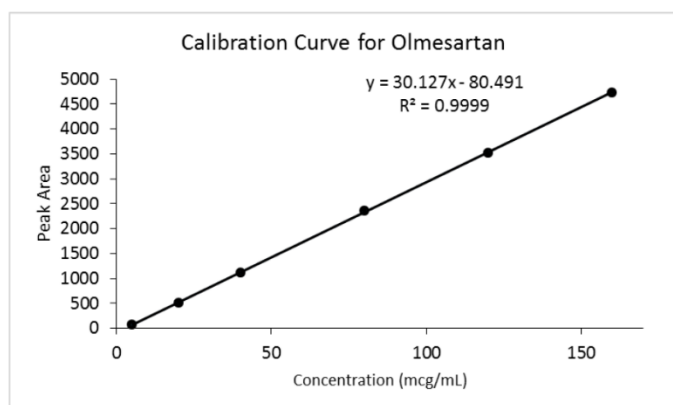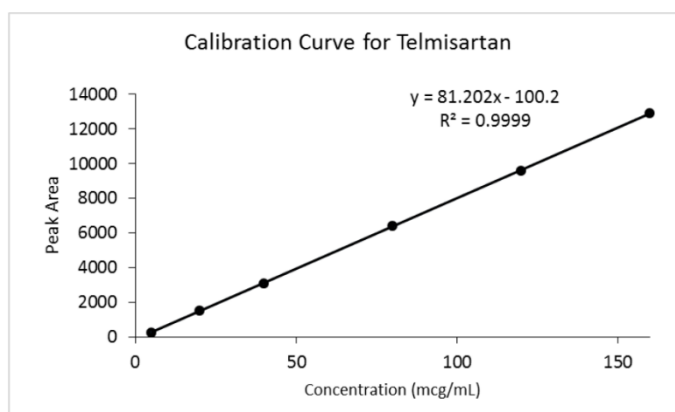

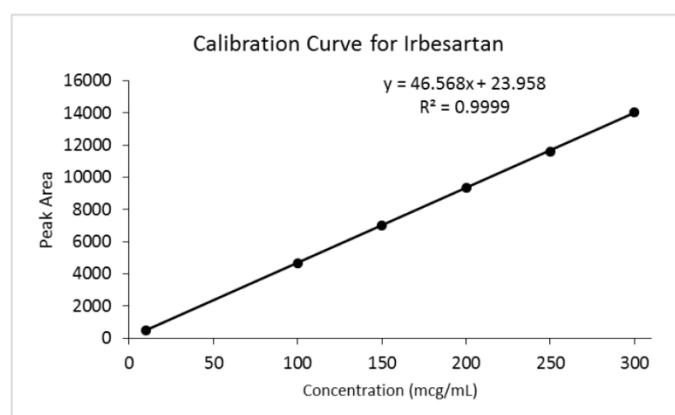

**Figure S1.** Calibration curves for analytes by proposed RP HPLC method.

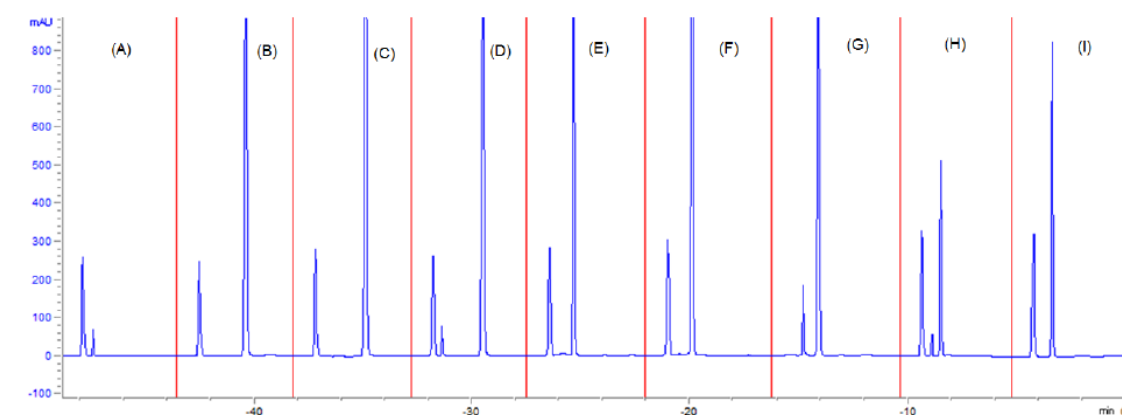

**Figure S2. Chromatograms of formulations;** HCZ:AMD:12.5:5  $\mu\text{g/ml}$  (A); HCZ:TEL:12.5:40  $\mu\text{g/ml}$  (B); HCZ:TEL:12.5:80  $\mu\text{g/ml}$  (C); HCZ:AMD:TEL:12.5:5:40  $\mu\text{g/ml}$  (D); HCZ:IRB:12.5:150  $\mu\text{g/ml}$  (E); HCZ:IRB:12.5:300  $\mu\text{g/ml}$  (F); AMD:IRB:10:150  $\mu\text{g/ml}$  (G); HCZ:AMD:OLM:12.5:5:20  $\mu\text{g/ml}$  (H); HCZ:OLM:12.5:40  $\mu\text{g/ml}$  (I).

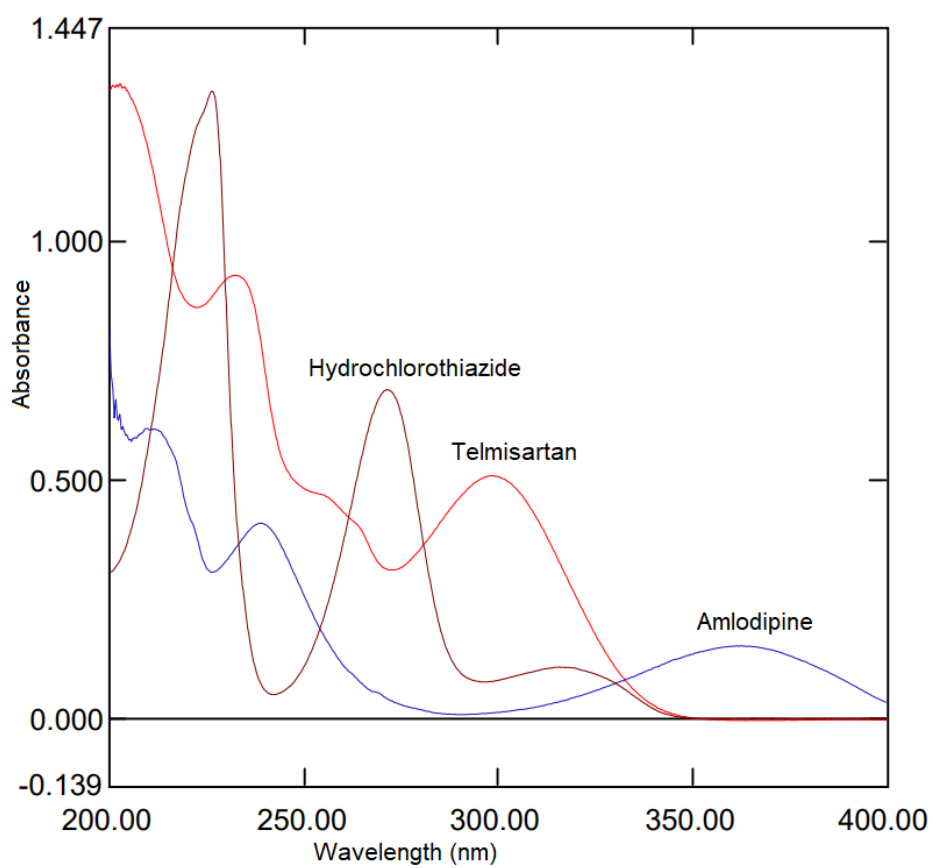

**Figure S3.** UV absorption spectra of amlodipine, Hydrochlorothiazide and Telmisartan.
